# Supplementary material for: Safety and efficacy of C1-inhibitor in traumatic brain injury (CIAO@TBI): study protocol for a randomized, placebo-controlled, multi-center trial
Source: Trials. 2021 Dec 4;22:874. doi: 10.1186/s13063-021-05833-1 (PMC8642972; doi:10.1186/s13063-021-05833-1)
Supplement: Supplementary file 3 — Additional file 3. Copy of the original funding documentation. [file 13063_2021_5833_MOESM3_ESM.zip]

Archive with 2 entries (2 files):
- Additional file 3a. Original funding documentation.pdf
- Additional file 3b. Original funding documentation.pdf
